# Supplementary material for: Burden of trichomonas vaginalis infection and its relationship with reproductive and clinical characteristics among women at Livingstone university teaching hospital
Source: Research Square preprint supplement (doi:10.21203/rs.3.rs-7970154/v1), 2025-11-18
Supplement: Supplementary file 1 [file b4dc7b2615bc75096fd35e9e.xlsx]

## Sheet: Sheet1
Participant ID	Age	Specimen Type	Geographic Location	Clinic/Ward	Educational level	Marital Status	Gestational Age	Abnormal Vaginal Discharge	Signs & Symptoms	Test Result	Dysuria	Dyspareuria	Gravidity	Parity	Miscarriages	Column20	Column21	Column22	Column23	Column24	Column25	Column27	Column28	Column29	Column30	Column31	Column32	Column33	Column34	Column35	Column36	Column37	Column38	Column39	Column40	Column41	Column42	Column43	Column44	Column45	Column46	Column47	Column48	Column49	Column50	Column51	Column52	Column53	Column54
1601	26	HVS swab	ellaine brittel	LCH-Materniy	primary	Married	25	present	Purulent discharge	1	present	Nil	3	2	0
1602	36	HVS swab	Ngwenya Area	LCH-Materniy	secondary	Married	32	present	Colpitis macularis	0	Nil	Nil	6	5	0
1603	33	HVS swab	Nakatindi	LCH-Materniy	secondary	Single	36	Nil	Nil	0	Nil	Nil	6	5	0
1604	29	urine	Ngwenya Area	LCH-Materniy	secondary	Married	32	Nil	Nil	1	Nil	present	3	2	0
1605	28	HVS swab	town area	LCH-Materniy	tertiary	Married	28	Nil	Nil	0	Nil	Nil	1	0	0
1606	24	urine	kombe drive	Boma Clinic	tertiary	Single	37	Nil	Nil	0	Nil	Nil	1	0	0
1607	27	urine	airport road	Boma Clinic	tertiary	Married	15	Nil	Nil	0	Nil	Nil	2	0	1
1608	24	urine	ellaine brittel	Boma Clinic	secondary	Single	28	Nil	Lower abdominal pain	0	Nil	Nil	2	1	0
1609	24	urine	more light	Boma Clinic	tertiary	Single	12	Nil	Nil	0	Nil	Nil	2	0	0
1610	15	urine	dambwa north	Boma Clinic	secondary	Single	24	Nil	Nil	0	Nil	Nil	1	0	0
1611	28	urine	highlands	Boma Clinic	tertiary	Married	28	Nil	Lower abdominal pain	0	Nil	Nil	3	1	1
1612	18	urine	dambwa north	Boma Clinic	secondary	Single	12	present	Lower abdominal pain	0	present	present	1	0	0
1613	29	urine	libuyu	Boma Clinic	secondary	Married	36	Nil	Nil	0	Nil	Nil	3	1	1
1614	21	HVS swab	libuyu	LCH-Materniy	secondary	Married	38	Nil	Nil	0	Nil	Nil	1	0	0
1615	33	HVS swab	kazungula	LCH-Materniy	primary	Married	39	present	faul smelling discharge, lower abdominal pain	1	Nil	Nil	3	2	0
1616	38	urine	simonga village	LCH-Materniy	secondary	Married	32	Nil	Nil	0	Nil	Nil	2	1	0
1617	28	urine	Ngwenya Area	LCH-Materniy	secondary	Married	32	Nil	Nil	0	Nil	Nil	3	2	0
1618	28	urine	ellaine brittel	LCH-Materniy	secondary	Married	32	Nil	lower abdominal pain	0	Nil	Nil	2	0	1
1619	31	urine	makunka	LCH-Materniy	secondary	Married	36	Nil	Nil	0	Nil	Nil	5	3	1
1620	30	urine	maramba area	LCH-Materniy	secondary	Married	41	Nil	Nil	0	Nil	Nil	1	0	0
1621	24	HVS swab	dambwa north	LCH-Materniy	secondary	Married	39	Nil	Nil	1	Nil	Nil	1	0	1
1622	23	HVS swab	dambwa north	LCH-Materniy	secondary	Single	8	present	Backache	0	Nil	present	1	0	0
1623	16	HVS swab	bombwe	LCH-Materniy	secondary	Single	32	Nil	Nil	0	Nil	present	1	0	0
1624	40	urine	highlands	Boma Clinic	tertiary	Married	37	present	Lower abdominal pain	0	present	Nil	5	3	1
1625	13	urine	highlands	Boma Clinic	tertiary	Married	32	Nil	Nil	0	Nil	Nil	1	0	0
1626	27	HVS swab	ellaine brittel	Boma Clinic	tertiary	Married	19	Nil	Nil	0	Nil	Nil	2	1	0
1627	20	urine	dambwa north	Boma Clinic	secondary	Married	34	Nil	Nil	0	Nil	Nil	1	0	0
1628	22	urine	dambwa north	Boma Clinic	secondary	Single	39	present	pruritus vulvae	1	present	Nil	1	0	0
1629	27	urine	town area	LCH-Materniy	secondary	Married	24	Nil	Nil	0	Nil	Nil	2	1	0
1630	28	HVS swab	libuyu	LCH-Materniy	secondary	Married	36	Nil	Spotting	0	Nil	present	3	1	1
1631	24	HVS swab	chileleko	LCH-Materniy	primary	Married	36	Nil	Nil	0	Nil	present	1	0	0
1632	24	HVS swab	ellaine brittel	LCH-Materniy	secondary	Married	32	Nil	pruritus vulvae	0	present	Nil	1	0	0
1633	35	urine	dambwa north	Accidents & Emergency	secondary	Single	21	present	Purulent discharge	1	Nil	Nil	2	1	0
1634	28	urine	maramba area	LCH-Materniy	primary	Married	26	Nil	Nil	0	Nil	Nil	2	1	0
1635	20	HVS swab	libuyu	LCH-Materniy	secondary	Single	32	Nil	Lower abdominal pain	0	Nil	present	1	0	0
1636	34	urine	ellaine brittel	LCH-Materniy	secondary	Married	36	Nil	Nil	1	Nil	present	3	2	0
1637	28	HVS swab	Ngwenya Area	LCH-Materniy	secondary	Married	18	Nil	Nil	0	Nil	Nil	1	0	0
1638	35	HVS swab	town area	LCH-Materniy	tertiary	Married	32	Nil	Nil	0	Nil	Nil	3	2	1
1639	18	HVS swab	libuyu	LCH-Materniy	primary	Single	24	Nil	Nil	0	Nil	present	1	0	0
1640	30	urine	mulala	LCH-Materniy	secondary	Married	36	Nil	Nil	0	Nil	Nil	3	2	0
1641	18	urine	mbita	LCH-Materniy	secondary	Married	36	Nil	Nil	0	Nil	Nil	2	0	1
1642	35	urine	dambwa north	LCH-Materniy	secondary	Married	29	Nil	Lower abdominal pain	0	Nil	present	2	0	1
1643	22	HVS swab	maramba area	LCH-Materniy	secondary	Single	32	Nil	Nil	0	Nil	Nil	1	0	0
1644	20	urine	dambwa site	Boma Clinic	secondary	Single	27	Nil	Nil	0	Nil	Nil	1	0	0
1645	31	urine	town area	Boma Clinic	tertiary	Married	18	Nil	Nil	0	present	Nil	2	1	0
1646	28	urine	town area	Boma Clinic	secondary	Married	24	Nil	Nil	0	Nil	Nil	1	0	0
1647	30	HVS swab	Nakatindi	LCH-Materniy	secondary	Married	37	Nil	Nil	0	present	Nil	2	1	0
1648	31	HVS swab	libuyu	LCH-Materniy	secondary	Single	31	Nil	Nil	0	Nil	Nil	4	3	0
1649	21	urine	kamatanda	LCH-Materniy	primary	Single	36	Nil	Nil	1	Nil	Nil	1	0	0
1650	28	HVS swab	libuyu	LCH-Materniy	secondary	Married	32	Nil	Nil	0	Nil	Nil	2	1	0
1651	42	HVS swab	mulala	LCH-Materniy	primary	Married	36	Nil	Nil	0	Nil	Nil	6	5	0
1652	35	HVS swab	kazungula	LCH-Materniy	secondary	Married	32	present	Mild discharge	1	Nil	Nil	4	3	0
1653	24	HVS swab	chifiti	LCH-Materniy	secondary	Married	32	Nil	Nil	0	present	Nil	2	1	0
1654	27	HVS swab	makonga	LCH-Materniy	primary	Married	32	Nil	Purulent discharge	1	Nil	Nil	5	4	0
1655	30	HVS swab	sikanzwe	LCH-Materniy	primary	Married	35	Nil	Nil	0	Nil	Nil	5	4	0
1656	34	HVS swab	highlands	LCH-Materniy	secondary	Married	37	Nil	Nil	0	Nil	Nil	6	5	0
1657	27	HVS swab	Ngwenya Area	LCH-Materniy	secondary	Single	32	Nil	Nil	0	Nil	Nil	3	2	0
1658	20	HVS swab	namatama	LCH-Materniy	secondary	Married	36	Nil	Nil	0	Nil	Nil	2	1	0
1659	17	HVS swab	namatama	LCH-Materniy	secondary	Single	28	present	Mild discharge	0	Nil	Nil	1	0	0
1660	40	HVS swab	highlands	LCH-Materniy	primary	Married	24	Nil	Nil	0	Nil	Nil	6	5	0
1661	26	urine	more light	LCH-Materniy	secondary	Married	32	Nil	Nil	0	Nil	Nil	3	1	1
1662	20	urine	libuyu	LCH-Materniy	primary	Married	32	Nil	Nil	1	Nil	Nil	5	4	0
1663	22	urine	DSSV	LCH-Materniy	secondary	Married	37	Nil	Nil	1	Nil	Nil	2	1	0
1664	31	urine	police camp	LCH-Materniy	primary	Single	39	Nil	Nil	0	Nil	Nil	5	4	0
1665	25	HVS swab	more light	LCH-Materniy	secondary	Married	32	present	pruritus vulvae	0	present	present	4	3	0
1666	19	urine	namatama	LCH-Materniy	secondary	Single	27	Nil	Nil	0	Nil	Nil	1	0	0
1667	34	urine	highlands	LCH-Materniy	secondary	Married	36	Nil	Nil	0	Nil	present	3	2	2
1668	28	HVS swab	libuyu	LCH-Materniy	secondary	Married	32	Nil	Dysuria	0	present	Nil	2	1	0
1669	31	urine	simonga village	LCH-Materniy	secondary	Married	41	Nil	Nil	0	Nil	Nil	2	1	0
1670	25	urine	mukuni village	LCH-Materniy	secondary	Married	36	Nil	Nil	0	Nil	Nil	2	1	0
1671	17	urine	mukalahani village	LCH-Materniy	secondary	Married	36	Nil	pruritus vulvae	0	present	Nil	1	0	0
1672	20	urine	makundo	LCH-Materniy	primary	Married	37	Nil	Lower abdominal pain	0	present	Nil	1	0	0
1673	20	urine	Ngwenya Area	LCH-Materniy	primary	Married	32	Nil	Nil	0	present	Nil	2	1	0
1674	23	HVS swab	town area	LCH-Materniy	tertiary	Single	28	present	Mild discharge	1	Nil	present	3	2	0
1675	28	HVS swab	ellaine brittel	LCH-Materniy	tertiary	Married	36	Nil	Nil	0	Nil	Nil	2	1	0
1676	18	HVS swab	dambwa north	LCH-Materniy	secondary	Single	38	Nil	Nil	0	Nil	Nil	1	0	0
1677	26	urine	airport road	Boma Clinic	secondary	Married	22	Nil	Nil	0	Nil	Nil	1	0	0
1678	30	urine	more light	Boma Clinic	secondary	Single	28	Nil	Nil	0	Nil	Nil	2	1	0
1679	32	urine	libuyu	Boma Clinic	secondary	Single	19	Nil	Lower abdominal pain	0	Nil	Nil	1	0	0
1680	21	urine	ellaine brittel	Boma Clinic	secondary	Single	27	Nil	Backache	0	Nil	present	1	0	0
1681	28	HVS swab	libuyu	LCH-Materniy	secondary	Married	36	Nil	Nil	0	present	Nil	2	1	0
1682		urine	more light	LCH-Materniy	primary	Single	28	Nil	Nil	0	Nil	present	1	0	0
1683	34	HVS swab	highlands	LCH-Materniy	tertiary	Married	40	Nil	Nil	0		Nil	2	1	0
1684	14	HVS swab	maramba area	LCH-Materniy	secondary	Single	37	Nil	pruritus vulvae	1	present	Nil	1	0	0
1685	20	urine	Ngwenya Area	LCH-Materniy	primary	Single	32	Nil	Spotting	0	present	Nil	3	2	0
1686	17	HVS swab	highlands	LCH-Materniy	primary	Single	36	present	Mild discharge	0	present	Nil	1	0	0
1687	32	urine	libuyu	LCH-Materniy	secondary	Married	24	present	Dysuria	0	present	Nil	4	3	0
1688	23	HVS swab	mwandi extension	LCH-Materniy	secondary	Married	40	Nil	Nil	0	Nil	Nil	1	0	0
1689	19	HVS swab	DSSV	LCH-Materniy	secondary	Single	45	Nil	Nil	0	Nil	Nil	1	0	0
1690	24	urine	simonga village	LCH-Materniy	secondary	Married	26	Nil	Nil	0	Nil	Nil	1	0	0
1691	29	urine	town area	Boma Clinic	secondary	Single	25	present	Purulent discharge	1	present	Nil	1	0	0
1692	32	urine	Nottie Broadie	Boma Clinic	tertiary	Married	21	Nil	Nil	0	Nil	Nil	4	2	1
1693	34	urine	maramba area	Boma Clinic	secondary	Married	35	present	Mild discharge	0	Nil	Nil	5	3	1
1694	30	urine	dambwa north	Boma Clinic	tertiary	Married	27	Nil	Nil	0	Nil	Nil	2	0	1
1695	37	urine	dambwa north	Boma Clinic	tertiary	Single	33	Nil	Nil	0	Nil	Nil	2	1	0
1696	28	urine	dambwa north	Boma Clinic	tertiary	Married	20	Nil	Nil	0	Nil	Nil	3	2	0
1697	21	urine	town area	Boma Clinic	tertiary	Single	16	Nil	Nil	0	Nil	Nil	2	0	1
1698	35	urine	Maambo way	Boma Clinic	tertiary	Married	33	Nil	Nil	0	Nil	Nil	3	2	0
1699	32	HVS swab	libuyu	LCH-Materniy	secondary	Married	36	present	Mild discharge	0	Nil	Nil	3	2	0
16100	35	HVS swab	maramba area	LCH-Materniy	secondary	Married	27	Nil	Nil	0	Nil	Nil	3	2	0
16101	26	urine	Nakatindi	LCH-Materniy	secondary	Single	34	Nil	Nil	0	Nil	Nil	4	3	0
16102	33	urine	dambwa north	LCH-Materniy	tertiary	Single	40	Nil	Nil	0	Nil	Nil	2	1	0
16103	30	urine	Ngwenya Area	LCH-Materniy	primary	Married	36	Nil	Nil	0	Nil	Nil	5	4	0
16104	25	HVS swab	kazungula	LCH-Materniy	secondary	Married	35	Nil	Nil	0	Nil	Nil	1	0	0
16105	20	urine	mukuni village	LCH-Materniy	secondary	Single	32	Nil	Nil	1	Nil	Nil	1	0	0
16106	16	urine	Nakatindi	LCH-Materniy	secondary	Single	36	Nil	Nil	0	Nil	present	0	0	0
16107	18	HVS swab	mahalituno village	LCH-Materniy	secondary	Single	34	present	pruritus vulvae	0	present	Nil	1	0	0
16108	29	urine	more light	Boma Clinic	tertiary	Married	27	Nil	Dysuria	0	present	Nil	2	1	0
16109	23	urine	dambwa site	Boma Clinic	secondary	Single	32	Nil	Nil	0	Nil	Nil	1	0	0
16110	31	urine	ellaine brittel	Boma Clinic	primary	Married	28	present	Mild discharge	0	Nil	Nil	3	2	1
16111	22	urine	town area	Boma Clinic	secondary	Single	24	Nil	Nil	0	Nil	Nil	1	0	0
16112	28	urine	Maambo way	Boma Clinic	tertiary	Married	32	Nil	Nil	0	Nil	Nil	1	0	0
16113	30	HVS swab	dambwa north	Boma Clinic	tertiary	Married	8	Nil	Lower abdominal pain	0	present	Nil	1	0	0
16114	24	urine	ellaine brittel	Boma Clinic	secondary	Married	28	Nil	Nil	0	Nil	Nil	1	0	0
16115	26	urine	town area	Boma Clinic	tertiary	Married	15	Nil	Nil	0	Nil	Nil	2	1	0
16116	20	urine	town area	Boma Clinic	secondary	Married	24	Nil	Nil	0	Nil	Nil	2	0	0
16117	21	urine	mbita	Boma Clinic	secondary	Single	12	Nil	Nil	0	Nil	Nil	1	0	0
16118	32	HVS swab	maramba area	LCH-Materniy	secondary	Married	35	present	Mild discharge	0	Nil	Nil	5	3	1
16119	22	HVS swab	mukuni village	LCH-Materniy	secondary	Single	33	Nil	Nil	1	Nil	Nil	2	1	0
16120	24	HVS swab	mwandi extension	LCH-Materniy	primary	Single	38	Nil	Nil	0	Nil	Nil	2	0	1
16121	16	HVS swab	maramba area	LCH-Materniy	secondary	Single	37	Nil	Nil	0	Nil	present	1	0	0
16122	34	urine	libuyu	Accidents & Emergency	secondary	Married	28	Nil	Lower abdominal pain	0	Nil	Nil	2	1	0
16123	35	HVS swab	dambwa north	Accidents & Emergency	secondary	Single	21	present	Purulent discharge	1	Nil	Nil	3	2	0
16124	30	HVS swab	highlands	Accidents & Emergency	tertiary	Single	24	Nil	Lower abdominal pain	0	Nil	Nil	1	0	0
16125	23	urine	simonga village	LCH-Materniy	secondary	Married	35	Nil	Nil	0	present	Nil	2	1	0
16126	19	HVS swab	Ngwenya Area	LCH-Materniy	secondary	Married	36	Nil	Nil	1	Nil	Nil	1	0	0
16127	34	HVS swab	town area	LCH-Materniy	secondary	Single	33	Nil	Lower abdominal pain	0	Nil	Nil	2	1	0
16128	28	urine	highlands	LCH-Materniy	primary	Single	30	present	Nil	0	Nil	Nil	1	0	0
16129	32	HVS swab	Nakatindi	LCH-Materniy	secondary	Married	35	Nil	Nil	0	Nil	present	3	2	0
16130	21	urine	Ngwenya Area	LCH-Materniy	secondary	Single	37	Nil	Nil	0	Nil	present	1	1	0
16131	17	HVS swab	maramba area	LCH-Materniy	secondary	Single	36	Nil	Nil	0	present	present	1	0	0
16132	24	urine	mwandi extension	LCH-Materniy	secondary	Married	39	Nil	Nil	0	Nil	present	2	1	0
16133	21	urine	mbita	LCH-Materniy	secondary	Married	34	Nil	Nil	1	Nil	Nil	1	0	0
16134	34	HVS swab	maramba area	LCH-Materniy	secondary	Married	36	present	Mild discharge	0	Nil	Nil	4	2	1
16135	23	HVS swab	Ngwenya Area	LCH-Materniy	primary	Single	32	Nil	Nil	0	Nil	Nil	2	1	0
16136	26	HVS swab	Ngunzu	LCH-Materniy	primary	Married	35	Nil	Nil	1	present	Nil	2	1	0
16137	18	urine	mulala	LCH-Materniy	secondary	Single	45	Nil	Nil	0	Nil	Nil	1	0	0
16138	30	HVS swab	railways	LCH-Materniy	secondary	Married	24	Nil	Nil	1	Nil	Nil	3	2	0
16139	27	HVS swab	town area	LCH-Materniy	tertiary	Single	28	present	Nil	0	Nil	Nil	2	1	0
16140	39	urine	highlands	Boma Clinic	tertiary	Married	38	present	Mild discharge	0	present	Nil	4	3	0
16141	25	HVS swab	more light	Boma Clinic	primary	Married	29	present	Mild discharge	0	Nil	Nil	3	1	1
16142	29	urine	libuyu	LCH-Materniy	secondary	Single	37	Nil	Nil	0	Nil	Nil	3	1	1
16143	22	HVS swab	dambwa north	LCH-Materniy	secondary	Single	32	Nil	Nil	0	Nil	Nil	1	0	0
16144	33	HVS swab	makunka	LCH-Materniy	primary	Married	38	Nil	Nil	0	Nil	Nil	5	3	1
16145	17	HVS swab	bombwe	LCH-Materniy	secondary	Single	33	Nil	Nil	0	Nil	Nil	1	0	0
16146	30	urine	ellaine brittel	LCH-Materniy	secondary	Single	35	Nil	Nil	0	Nil	Nil	2	0	1
16147	29	HVS swab	Ngwenya Area	LCH-Materniy	secondary	Married	36	Nil	Nil	0	Nil	Nil	2	1	0
16148	26	HVS swab	ellaine brittel	LCH-Materniy	secondary	Married	32	present	Colpitis macularis	1	Nil	present	4	2	1
16149	30	HVS swab	kashitu	LCH-Materniy	secondary	Married	33	Nil	Nil	0	Nil	present	2	1	0
16150	16	HVS swab	libuyu	LCH-Materniy	secondary	Single	41	present	Mild discharge	0	Nil	present	1	0	0
16151	29	HVS swab	libuyu	LCH-Materniy	secondary	Married	40		Nil	0	Nil	Nil	2	1	0
16152	34	urine	dambwa north	Boma Clinic	secondary	Married	20	Nil	Nil	0	Nil	Nil	1	0	0
16153	39	urine	ellaine brittel	Boma Clinic	tertiary	Married	32	present	Mild discharge	1	Nil	present	2	1	0
16154	24	urine	town area	Boma Clinic	secondary	Single	28	Nil	Nil	0	Nil	Nil	1	0	0
16155	31	HVS swab	sikanzwe	LCH-Materniy	primary	Married	36	Nil	Nil	0	Nil	Nil	4	3	0
16156	40	HVS swab	mulala	LCH-Materniy	primary	Married	38	Nil	Nil	0	Nil	Nil	5	3	1
16157	25	HVS swab	highlands	LCH-Materniy	secondary	Single	38	Nil	Lower abdominal pain	0	present	present	6	4	1
16158	28	urine	maramba area	LCH-Materniy	secondary	Married	35	Nil	Nil	0	Nil	Nil	2	1	0
16159	36	HVS swab	libuyu	LCH-Materniy	secondary	Married	37	Nil	Nil	0	present	Nil	3	2	0
16160	22	HVS swab	Nakatindi	LCH-Materniy	primary	Single	34	present	Purulent discharge	1	Nil	Nil	1	0	0
16161	27	urine	namatama	LCH-Materniy	secondary	Married	29	present	Purulent discharge	0	Nil	Nil	2	1	0
16162	20	urine	ellaine brittel	LCH-Materniy	secondary	Single	38	Nil	Nil	0	present	Nil	1	0	0
16163	30	urine	dambwa north	Boma Clinic	tertiary	Married	24	Nil	Nil	0	Nil	Nil	1	0	0
16164	21	urine	more light	Boma Clinic	secondary	Single	32	Nil	Nil	0	present	Nil	1	0	0
16165	27	urine	town area	Boma Clinic	tertiary	Married	18	Nil	Nil	0	Nil	Nil	2	0	1
16166	36	urine	highlands	Boma Clinic	secondary	Married	33	Nil	Nil	0	Nil	present	5	3	1
16167	40	urine	ellaine brittel	Boma Clinic	primary	Married	38	Nil	Lower abdominal pain	0	Nil	Nil	3	2	0
16168	31	urine	libuyu	Boma Clinic	primary	Married	33	Nil	Nil	0	Nil	Nil	4	3	0
16169	34	urine	dambwa north	Boma Clinic	secondary	Married	29	Nil	Nil	0	Nil	Nil	2	0	1
16170	19	HVS swab	mbita	LCH-Materniy	secondary	Single	37	Nil	Nil	0	Nil	Nil	1	0	0
16171	23	urine	mulala	LCH-Materniy	secondary	Married	36	Nil	pruritus vulvae	0	Nil		2	1	0
16172	21	urine	dambwa north	LCH-Materniy	secondary	Married	32	Nil	Nil	0	Nil	Nil	1	0	0
16173	17	HVS swab	DSSV	LCH-Materniy	secondary	Single	42	Nil	Nil	0	Nil	Nil	1	0	0
16174	22	HVS swab	sikanzwe	LCH-Materniy	primary	Married	35	present	Mild discharge	0	Nil	Nil	2	1	0
16175	30	urine	dambwa north	LCH-Materniy	tertiary	Married	29	Nil	Nil	1	Nil	Nil	2	1	0
16176	36	urine	dambwa north	LCH-Materniy	tertiary	Single	34	Nil	Nil	0	Nil	Nil	3	1	1
16177	31	HVS swab	libuyu	LCH-Materniy	secondary	Married	31	Nil	Nil	0	Nil	Nil	2	1	0
16178	28	urine	town area	LCH-Materniy	secondary	Single	27	Nil	Nil	0	Nil	Nil	1	0	0
16179	22	HVS swab	town area	LCH-Materniy	tertiary	Single	18	Nil	Nil	0	Nil	Nil	2	0	1
16180	32	urine	highlands	LCH-Materniy	tertiary	Married	35	Nil	Nil	0	Nil	Nil	3	2	0
16181	26	urine	mukuni village	LCH-Materniy	secondary	Married	36	Nil	Nil	0	Nil	present	1	0	0
16182	29	urine	makundo	LCH-Materniy	primary	Married	38	Nil	Nil	0	Nil	Nil	2	1	0
16183	30	HVS swab	more light	LCH-Materniy	primary	Married	32	Nil	pruritus vulvae	0	Nil	Nil	3	2	0
16184	27	HVS swab	mwandi extension	LCH-Materniy	secondary	Married	39	Nil	Nil	0	Nil	Nil	1	0	0
16185	30	HVS swab	maramba area	LCH-Materniy	secondary	Single	38	Nil	Nil	0	Nil	Nil	1	0	0
16186	26	urine	dambwa site	LCH-Materniy	tertiary	Married	36	Nil	Nil	0	present	Nil	3	1	1
16187	23	urine	dambwa north	Boma Clinic	secondary	Single	31	Nil	Nil	0	Nil	Nil	2	1	0
16188	30	urine	highlands	Boma Clinic	secondary	Married	28	Nil	Nil	0	Nil	Nil	2	1	0
16189	25	urine	more light	Boma Clinic	tertiary	Single	16	Nil	Nil	0	present	Nil	1	0	0
16190	31	urine	libuyu	Boma Clinic	secondary	Married	33	present	pruritus vulvae	0	Nil	Nil	2	1	0
16191	34	HVS swab	Linda	Boma Clinic	secondary	Married	24	Nil	Nil	0
19192	25	urine	mwandi extension	Boma Clinic	tertiary	Single	16	Nil	Nil	0	Nil	Nil	2	1	0
16193	30	HVS swab	ellaine brittel	LCH-Materniy	secondary	Married	36	Nil	Nil	1	Nil	Nil	2	2	0
16194	26	HVS swab	dambwa north	LCH-Materniy	secondary	Married	29	Nil	Nil	0	Nil	Nil	2	0	0
16195	19	HVS swab	DSSV	LCH-Materniy	secondary	Single	35	Nil	Nil	0	Nil	present	1	0	1
16196	29	HVS swab	more light	LCH-Materniy	secondary	Married	32	Nil	Nil	0	Nil	Nil	2	2	0
16197	22	urine	Nottie Broadie	LCH-Materniy	secondary	Married	24	Nil	Nil	0	Nil	Nil	1	0	0
16198	32	urine	maramba area	LCH-Materniy	tertiary	Married	16	present	Purulent discharge	0	Nil	Nil	1	0	0
16199	27	urine	Ngwenya Area	LCH-Materniy	secondary	Single	35	Nil	Nil	0	Nil	Nil	2	2	0
16200	31	HVS swab	highlands	LCH-Materniy	primary	Married	37	Nil	Nil	0	Nil	Nil	2	1	0
[truncated: 5,000 more columns]
